# Supplementary material for: Longitudinal Monitoring of Intra-Tumoural Heterogeneity Using Optical Barcoding of Patient-Derived Colorectal Tumour Models
Source: MDPI journal article supplement (doi:10.3390/cancers14030581), 2022-01-24
Supplement: s1 [file s1]

## Supplementary Data

Table S1 | Doubling time estimation of wildtype and optically barcoded cell lines

| Cell Line | Variant | Doubling time (hours)<br>± 95% CI |
|-----------|---------|-----------------------------------|
| CPP14     | WT      | 31.7 ± 8.4                        |
|           | L6      | 29.8 ± 9.6                        |
| CPP19     | WT      | 39.7 ± 8.7                        |
|           | L6      | 36.9 ± 4.9                        |
| CPP35     | WT      | 40.3 ± 15.9                       |
|           | L6      | 39.5 ± 12.05                      |

Table S2 | Profiling of MEK-inhibitor responses in wildtype and optically barcoded cell lines

| Cell Line | Variant | Drug        | LogIC <sub>50</sub> ± 95% CI | Fold Change |
|-----------|---------|-------------|------------------------------|-------------|
| CPP14     | WT      | Cobimetinib | -6.90 ± 0.56                 | 0.95        |
|           | L6      |             | -7.28 ± 0.30                 |             |
|           | WT      | Selumetinib | -6.66 ± 0.62                 | 0.94        |
|           | L6      |             | -7.10 ± 0.46                 |             |
| CPP19     | WT      | Cobimetinib | -7.24 ± 0.54                 | 0.99        |
|           | L6      |             | -7.29 ± 0.63                 |             |
|           | WT      | Selumetinib | -7.33 ± 0.6                  | 1.02        |
|           | L6      |             | -7.22 ± 0.72                 |             |
| CPP35     | WT      | Cobimetinib | -6.70 ± 0.84                 | 1.06        |
|           | L6      |             | -6.35 ± 0.98                 |             |
|           | WT      | Selumetinib | -5.69 <sup>^</sup>           | 1.34        |
|           | L6      |             | -4.23 <sup>^</sup>           |             |

<sup>^</sup> 95% CI unable to be determined as 50% cell death not achieved at this dose range

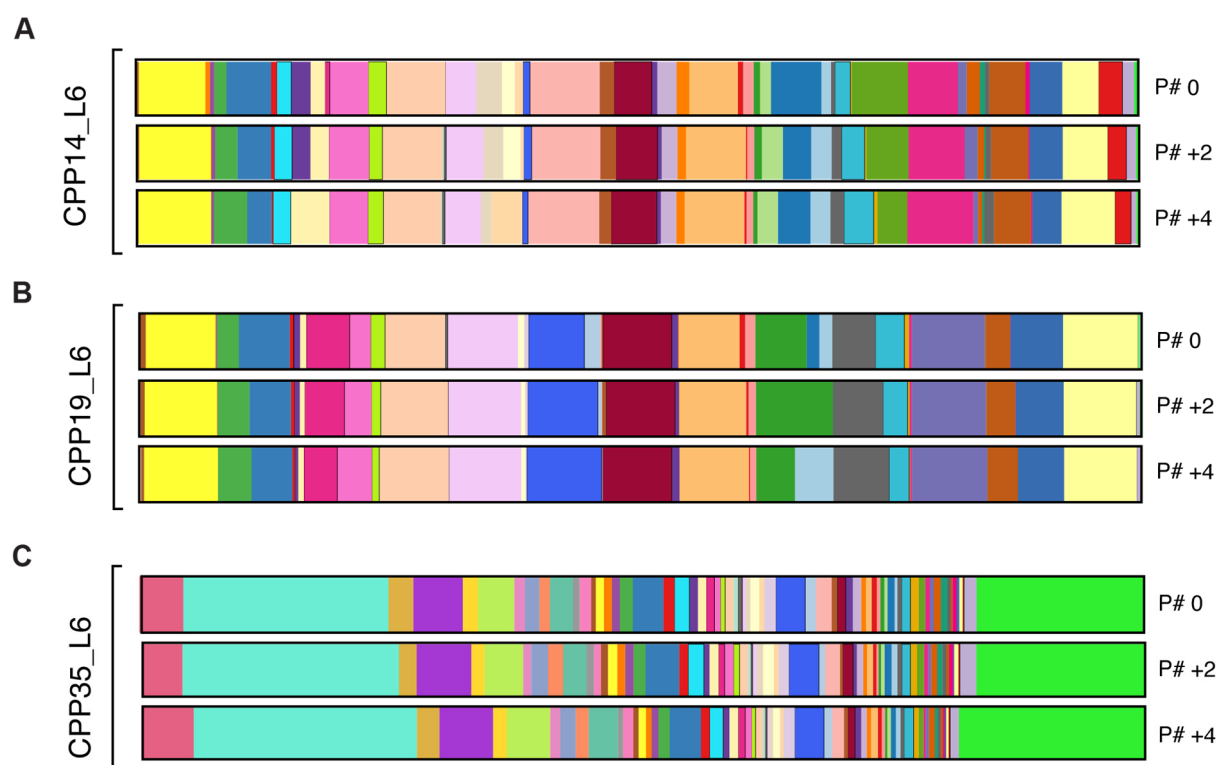

**Figure S1 | Optical barcoding of 2D CRC cell lines show limited change in cluster distribution upon serial passaging**

Barcharts illustrating cluster frequencies following serial flow cytometric analysis of three optically barcoded CRC cell lines; **(A)** CPP14-L6 **(B)** CPP19-L6 and **(C)** CPP35-L6.
